# Supplementary material for: Radiative cooling of H3O+ and its deuterated isotopologues
Source: Phys Chem Chem Phys. 2016 Sep 1;18(37):26268–74. doi: 10.1039/c6cp04661d (PMC5315019; doi:10.1039/c6cp04661d)
Supplement: Supplementary file 1 [file CP-018-C6CP04661D-s001.xlsx]

## Sheet: readme
E	Energy term value, cm-1
tau, s	life time, s
J	Rotational angular momentum, D3h(M)
Sym-tot	Total rovibrational symmetry
v1str	v1-local mode stretching quantum number
v2str	v2-local mode stretching quantum number
v3str	v3-local mode stretching quantum number
v4bnd	v4-local mode bending quantum number (E symmetry)
v5bnd	v5-local mode bending quantum number (E symmetry)
v6inv	v6-local mode inversion quantum number, where v6=1 is the inversion state 0^-
Sym-vib	Vibrational symmetry D3h(M)
K	Rotational quantum number, projection of J
tau-rot	Rotational parity quantum number
Sym-rot	Rotational symmetry D3h(M)
inf	Infinitely long time

## Sheet: H3Op
E	tau, s	J	Sym-tot	v1str	v2str	v3str	v4bnd	v5bnd	v6inv	Sym-vib	K	tau-rot	Sym-rot
17.3762	inf	1	E"	0	0	0	0	0	0	A1'	1	0	E"
22.4663	inf	1	A2'	0	0	0	0	0	0	A1'	0	1	A2'
47.0314	754957884	2	E'	0	0	0	0	0	0	A1'	2	0	E'
55.0305	28.2987	0	A2"	0	0	0	0	0	1	A2"	0	0	A1'
62.2876	827196370	2	E"	0	0	0	0	0	0	A1'	1	0	E"
72.2901	11.7372	1	E'	0	0	0	0	0	1	A2"	1	0	E"
88.9592	inf	3	A2"	0	0	0	0	0	0	A1'	3	0	A2"
101.993	8.84012	2	E"	0	0	0	0	0	1	A2"	2	0	E'
114.368	2160.61	3	E'	0	0	0	0	0	0	A1'	2	0	E'
116.412	3.06675	2	E'	0	0	0	0	0	1	A2"	1	0	E"
121.214	2.52709	2	A2"	0	0	0	0	0	1	A2"	0	0	A1'
129.574	1117.2	3	E"	0	0	0	0	0	0	A1'	1	0	E"
134.637	934.35	3	A2'	0	0	0	0	0	0	A1'	0	1	A2'
143.149	558211523	4	E'	0	0	0	0	0	0	A1'	4	0	E'
144.133	7.78256	3	A2'	0	0	0	0	0	1	A2"	3	1	A1"
168.149	2.04998	3	E"	0	0	0	0	0	1	A2"	2	0	E'
178.702	121.373	4	A2"	0	0	0	0	0	0	A1'	3	0	A2"
182.534	1.43661	3	E'	0	0	0	0	0	1	A2"	1	0	E"
198.7	7.17029	4	E"	0	0	0	0	0	1	A2"	4	0	E'
204	63.0096	4	E'	0	0	0	0	0	0	A1'	2	0	E'
209.585	4416474620	5	E"	0	0	0	0	0	0	A1'	5	0	E"
219.141	47.1426	4	E"	0	0	0	0	0	0	A1'	1	0	E"
232.302	1.5157	4	A2'	0	0	0	0	0	1	A2"	3	1	A1"
255.28	32.9177	5	E'	0	0	0	0	0	0	A1'	4	0	E'
256.243	0.985354	4	E"	0	0	0	0	0	1	A2"	2	0	E'
265.679	6.7132	5	E'	0	0	0	0	0	1	A2"	5	0	E"
270.584	0.818637	4	E'	0	0	0	0	0	1	A2"	1	0	E"
275.36	0.775558	4	A2"	0	0	0	0	0	1	A2"	0	0	A1'
290.641	16.7209	5	A2"	0	0	0	0	0	0	A1'	3	0	A2"
308.86	1.17752	5	E"	0	0	0	0	0	1	A2"	4	0	E'
315.802	11.8861	5	E'	0	0	0	0	0	0	A1'	2	0	E'
330.861	9.98779	5	E"	0	0	0	0	0	0	A1'	1	0	E"
335.872	9.41797	5	A2'	0	0	0	0	0	0	A1'	0	1	A2'
342.335	0.73252	5	A2'	0	0	0	0	0	1	A2"	3	1	A1"
366.18	0.581344	5	E"	0	0	0	0	0	1	A2"	2	0	E'
380.465	0.51886	5	E'	0	0	0	0	0	1	A2"	1	0	E"
596.337	0.0291081	1	E"	0	0	0	0	0	2	A1'	1	0	E"
601.402	0.0289338	1	A2'	0	0	0	0	0	2	A1'	0	1	A2'
625.794	0.028957	2	E'	0	0	0	0	0	2	A1'	2	0	E'
640.983	0.0284488	2	E"	0	0	0	0	0	2	A1'	1	0	E"
667.439	0.0288184	3	A2"	0	0	0	0	0	2	A1'	3	0	A2"
692.739	0.0279932	3	E'	0	0	0	0	0	2	A1'	2	0	E'
707.913	0.0275287	3	E"	0	0	0	0	0	2	A1'	1	0	E"
712.97	0.0273786	3	A2'	0	0	0	0	0	2	A1'	0	1	A2'
721.266	0.0286913	4	E'	0	0	0	0	0	2	A1'	4	0	E'
756.659	0.0275631	4	A2"	0	0	0	0	0	2	A1'	3	0	A2"
781.926	0.0268297	4	E'	0	0	0	0	0	2	A1'	2	0	E'
787.266	0.0308773	5	E"	0	0	0	0	0	2	A1'	5	0	E"
797.081	0.0264155	4	E"	0	0	0	0	0	2	A1'	1	0	E"
832.732	0.031151	5	E'	0	0	0	0	0	2	A1'	4	0	E'
868.069	0.0314067	5	A2"	0	0	0	0	0	2	A1'	3	0	A2"
893.295	0.0316138	5	E'	0	0	0	0	0	2	A1'	2	0	E'
908.424	0.0317481	5	E"	0	0	0	0	0	2	A1'	1	0	E"
913.466	0.0317946	5	A2'	0	0	0	0	0	2	A1'	0	1	A2'
950.942	0.016025	0	A2"	0	0	0	0	0	3	A2"	0	0	A1'
967.894	0.0159366	1	E'	0	0	0	0	0	3	A2"	1	0	E"
997.383	0.0158488	2	E"	0	0	0	0	0	3	A2"	2	0	E'

## Sheet: D3Op
E	tau, s	J	Sym-tot	v1str	v2str	v3str	v4bnd	v5bnd	v6inv	Sym-vib	K	tau-rot	Sym-rot
0	inf	0	A1'	0	0	0	0	0	0	A1'	0	0	A1'
8.7809	inf	1	E''	0	0	0	0	0	0	A1'	1	1	E''
11.3328	inf	1	A2'	0	0	0	0	0	0	A1'	1	0	A2'
15.3769	13595.2	0	A2''	0	0	0	0	0	1	A2''	0	0	A1'
23.7891	27029267200	2	E'	0	0	0	0	0	0	A1'	2	2	E'
24.1435	496.143	1	E'	0	0	0	0	0	1	A2''	1	1	E''
26.6475	142.544	1	A1''	0	0	0	0	0	1	A2''	1	0	A2'
31.4419	7706.1	2	E''	0	0	0	0	0	0	A1'	2	1	E''
33.9915	5669.28	2	A1'	0	0	0	0	0	0	A1'	2	0	A1'
39.1712	370.876	2	E''	0	0	0	0	0	1	A2''	2	2	E'
45.0229	6004504340	3	A1''	0	0	0	0	0	0	A1'	3	3	A1''
45.0229	inf	3	A2''	0	0	0	0	0	0	A1'	3	3	A2''
46.6805	53.0981	2	E'	0	0	0	0	0	1	A2''	2	1	E''
49.1826	41.4018	2	A2''	0	0	0	0	0	1	A2''	2	0	A1'
57.7737	586.276	3	E'	0	0	0	0	0	0	A1'	3	2	E'
60.4582	326.594	3	A1'	0	0	0	0	0	1	A2''	3	3	A2''
60.4582	326.594	3	A2'	0	0	0	0	0	1	A2''	3	3	A1''
65.4163	358.056	3	E''	0	0	0	0	0	0	A1'	3	1	E''
67.9625	315.857	3	A2'	0	0	0	0	0	0	A1'	3	0	A2'
72.4793	18744382300	4	E'	0	0	0	0	0	0	A1'	4	4	E'
72.9699	30.456	3	E''	0	0	0	0	0	1	A2''	3	2	E'
80.4709	19.8468	3	E'	0	0	0	0	0	1	A2''	3	1	E''
82.9702	17.7982	3	A1''	0	0	0	0	0	1	A2''	3	0	A2'
88.0018	301.505	4	E''	0	0	0	0	0	1	A2''	4	4	E'
90.3262	173.475	4	A1''	0	0	0	0	0	0	A1'	4	3	A1''
90.3262	173.475	4	A2''	0	0	0	0	0	0	A1'	4	3	A2''
103.055	98.7485	4	E'	0	0	0	0	0	0	A1'	4	2	E'
105.513	20.1343	4	A1'	0	0	0	0	0	1	A2''	4	3	A2''
105.514	20.1343	4	A2'	0	0	0	0	0	1	A2''	4	3	A1''
110.684	77.8665	4	E''	0	0	0	0	0	0	A1'	4	1	E''
113.225	72.6525	4	A1'	0	0	0	0	0	0	A1'	4	0	A1'
118.007	12.1859	4	E''	0	0	0	0	0	1	A2''	4	2	E'
125.496	9.87928	4	E'	0	0	0	0	0	1	A2''	4	1	E''
127.992	9.29686	4	A2''	0	0	0	0	0	1	A2''	4	0	A1'
451.584	0.0886697	0	A1'	0	0	0	0	0	2	A1'	0	0	A1'
460.354	0.0884808	1	E''	0	0	0	0	0	2	A1'	1	1	E''
463.036	0.0882609	1	A2'	0	0	0	0	0	2	A1'	1	0	A2'
475.214	0.0883249	2	E'	0	0	0	0	0	2	A1'	2	2	E'
483.255	0.0876722	2	E''	0	0	0	0	0	2	A1'	2	1	E''
485.935	0.0874576	2	A1'	0	0	0	0	0	2	A1'	2	0	A1'
496.159	0.0882011	3	A1''	0	0	0	0	0	2	A1'	3	3	A1''
496.159	0.0882011	3	A2''	0	0	0	0	0	2	A1'	3	3	A2''
509.557	0.0871239	3	E'	0	0	0	0	0	2	A1'	3	2	E'
517.592	0.0864946	3	E''	0	0	0	0	0	2	A1'	3	1	E''
520.269	0.0862875	3	A2'	0	0	0	0	0	2	A1'	3	0	A2'
523.19	0.0881083	4	E'	0	0	0	0	0	2	A1'	4	4	E'
541.941	0.0866133	4	A1''	0	0	0	0	0	2	A1'	4	3	A1''
541.941	0.0866133	4	A2''	0	0	0	0	0	2	A1'	4	3	A2''
555.323	0.0855868	4	E'	0	0	0	0	0	2	A1'	4	2	E'
563.348	0.0849867	4	E''	0	0	0	0	0	2	A1'	4	1	E''
566.022	0.0847893	4	A1'	0	0	0	0	0	2	A1'	4	0	A1'
642.788	0.0554761	0	A2''	0	0	0	0	0	3	A2''	0	0	A1'
651.473	0.0553169	1	E'	0	0	0	0	0	3	A2''	1	1	E''
653.901	0.0551542	1	A1''	0	0	0	0	0	3	A2''	1	0	A2'
666.412	0.0551633	2	E''	0	0	0	0	0	3	A2''	2	2	E'
673.694	0.0546816	2	E'	0	0	0	0	0	3	A2''	2	1	E''
676.121	0.0545234	2	A2''	0	0	0	0	0	3	A2''	2	0	A1'
687.604	0.0550148	3	A1'	0	0	0	0	0	3	A2''	3	3	A2''
687.604	0.0550148	3	A2'	0	0	0	0	0	3	A2''	3	3	A1''
699.738	0.0542223	3	E''	0	0	0	0	0	3	A2''	3	2	E'
707.015	0.0537602	3	E'	0	0	0	0	0	3	A2''	3	1	E''
709.44	0.0536083	3	A1''	0	0	0	0	0	3	A2''	3	0	A2'
715.047	0.0548711	4	E''	0	0	0	0	0	3	A2''	4	4	E'
732.029	0.0537752	4	A1'	0	0	0	0	0	3	A2''	4	3	A2''
732.029	0.0537752	4	A2'	0	0	0	0	0	3	A2''	4	3	A1''
744.151	0.0530248	4	E''	0	0	0	0	0	3	A2''	4	2	E'
751.422	0.052587	4	E'	0	0	0	0	0	3	A2''	4	1	E''
753.845	0.052443	4	A2''	0	0	0	0	0	3	A2''	4	0	A1'
993.516	0.0354469	0	A1'	0	0	0	0	0	4	A1'	0	0	A1'

## Sheet: H2DOp
E	tau, s	J	Sym-tot	v1str	v2str	v3str	v4bnd	v5bnd	v6inv	Sym-vib	K	tau-rot	Sym-rot
0	inf	0	A1	0	0	0	0	0	0	A1	0	0	A1
11.695	259296	1	A2	0	0	0	0	0	0	A1	0	1	A2
15.7042	inf	1	B1	0	0	0	0	0	0	A1	1	0	B1
18.0669	2.29305e+07	1	B2	0	0	0	0	0	0	A1	1	1	B2
34.3041	30446.8	2	A1	0	0	0	0	0	0	A1	0	0	A1
36.7254	46613.5	2	B2	0	0	0	0	0	0	A1	1	1	B2
40.3944	86.6066	0	B1	0	0	0	0	0	1	B1	0	0	A1
43.8105	24975.9	2	B1	0	0	0	0	0	0	A1	1	0	B1
52.0715	39.6236	1	B2	0	0	0	0	0	1	B1	0	1	A2
55.8239	7.69857e+06	2	A2	0	0	0	0	0	0	A1	2	1	A2
55.954	22.2659	1	A1	0	0	0	0	0	1	B1	1	0	B1
56.6001	416981	2	A1	0	0	0	0	0	0	A1	2	0	A1
58.2068	14.4527	1	A2	0	0	0	0	0	1	B1	1	1	B2
66.6965	9682.74	3	A2	0	0	0	0	0	0	A1	0	1	A2
67.8254	11331.1	3	B1	0	0	0	0	0	0	A1	1	0	B1
74.6904	23.8192	2	B1	0	0	0	0	0	1	B1	0	0	A1
77.0524	20.5164	2	A2	0	0	0	0	0	1	B1	1	1	B2
81.8164	3820.08	3	B2	0	0	0	0	0	0	A1	1	1	B2
83.808	8.27426	2	A1	0	0	0	0	0	1	B1	1	0	B1
90.8711	1321.83	3	A1	0	0	0	0	0	0	A1	2	0	A1
94.322	1823.61	3	A2	0	0	0	0	0	0	A1	2	1	A2
95.4459	5.49019	2	B2	0	0	0	0	0	1	B1	2	1	A2
96.1771	5.1957	2	B1	0	0	0	0	0	1	B1	2	0	A1
107.179	19.0687	3	B2	0	0	0	0	0	1	B1	0	1	A2
108.242	4327.04	4	A1	0	0	0	0	0	0	A1	0	0	A1
108.296	18.843	3	A1	0	0	0	0	0	1	B1	1	0	B1
108.678	4557	4	B2	0	0	0	0	0	0	A1	1	1	B2
117.175	245.143	3	B1	0	0	0	0	0	0	A1	3	0	B1
117.349	251.943	3	B2	0	0	0	0	0	0	A1	3	1	B2
121.639	5.15349	3	A2	0	0	0	0	0	1	B1	1	1	B2
130.463	4.27762	3	B1	0	0	0	0	0	1	B1	2	0	A1
131.15	292.486	4	B1	0	0	0	0	0	0	A1	1	0	B1
133.716	3.61747	3	B2	0	0	0	0	0	1	B1	2	1	A2
136.96	189.458	4	A2	0	0	0	0	0	0	A1	2	1	A2
145.575	187.975	4	A1	0	0	0	0	0	0	A1	2	0	A1
148.934	17.2834	4	B1	0	0	0	0	0	1	B1	0	0	A1
149.382	17.4761	4	A2	0	0	0	0	0	1	B1	1	1	B2
155.849	2.41866	3	A1	0	0	0	0	0	1	B1	3	0	B1
156.006	2.40357	3	A2	0	0	0	0	0	1	B1	3	1	B2
158.896	2275.96	5	A2	0	0	0	0	0	0	A1	0	1	A2
159.046	2310.55	5	B1	0	0	0	0	0	0	A1	1	0	B1
165.007	67.7326	4	B2	0	0	0	0	0	0	A1	3	1	B2
166.13	72.7095	4	B1	0	0	0	0	0	0	A1	3	0	B1
170.831	3.53802	4	A1	0	0	0	0	0	1	B1	1	0	B1
176.566	3.31912	4	B2	0	0	0	0	0	1	B1	2	1	A2
184.693	2.49292	4	B1	0	0	0	0	0	1	B1	2	0	A1
190.518	71.2534	5	B2	0	0	0	0	0	0	A1	1	1	B2
193.571	59.8541	5	A1	0	0	0	0	0	0	A1	2	0	A1
199.938	16.2875	5	B2	0	0	0	0	0	1	B1	0	1	A2
200.111	19.955	4	A2	0	0	0	0	0	0	A1	4	1	A2
200.13	16.5048	5	A1	0	0	0	0	0	1	B1	1	0	B1
200.168	22.3376	4	A1	0	0	0	0	0	0	A1	4	0	A1
203.693	1.99783	4	A2	0	0	0	0	0	1	B1	3	1	B2
204.693	1.91706	4	A1	0	0	0	0	0	1	B1	3	0	B1
209.731	48.3514	5	A2	0	0	0	0	0	0	A1	2	1	A2
224.665	26.3676	5	B1	0	0	0	0	0	0	A1	3	0	B1
228.546	29.4179	5	B2	0	0	0	0	0	0	A1	3	1	B2
230.191	2.64289	5	A2	0	0	0	0	0	1	B1	1	1	B2
233.329	2.62266	5	B1	0	0	0	0	0	1	B1	2	0	A1
237.601	1.30135	4	B2	0	0	0	0	0	1	B1	4	1	A2
237.628	1.30055	4	B1	0	0	0	0	0	1	B1	4	0	A1
248.533	1.77686	5	B2	0	0	0	0	0	1	B1	2	1	A2
259.918	8.98554	5	A1	0	0	0	0	0	0	A1	4	0	A1
260.331	12.6354	5	A2	0	0	0	0	0	0	A1	4	1	A2
263.439	1.65956	5	A1	0	0	0	0	0	1	B1	3	0	B1
266.854	1.46035	5	A2	0	0	0	0	0	1	B1	3	1	B2
297.327	1.10089	5	B1	0	0	0	0	0	1	B1	4	0	A1
297.564	1.09705	5	B2	0	0	0	0	0	1	B1	4	1	A2
305.069	6.80442	5	B1	0	0	0	0	0	0	A1	5	0	B1
305.076	6.77866	5	B2	0	0	0	0	0	0	A1	5	1	B2
340.782	0.78504	5	A1	0	0	0	0	0	1	B1	5	0	B1
340.787	0.785	5	A2	0	0	0	0	0	1	B1	5	1	B2
533.003	0.040155	0	A1	0	0	0	0	0	2	A1	0	0	A1
544.627	0.0400534	1	A2	0	0	0	0	0	2	A1	0	1	A2
548.717	0.0399122	1	B1	0	0	0	0	0	2	A1	1	0	B1
551.115	0.0397996	1	B2	0	0	0	0	0	2	A1	1	1	B2
567.087	0.039896	2	A1	0	0	0	0	0	2	A1	0	0	A1
569.564	0.0398244	2	B2	0	0	0	0	0	2	A1	1	1	B2
576.754	0.0394909	2	B1	0	0	0	0	0	2	A1	1	0	B1
589.021	0.0390866	2	A2	0	0	0	0	0	2	A1	2	1	A2
589.806	0.0390449	2	A1	0	0	0	0	0	2	A1	2	0	A1
599.24	0.0397413	3	A2	0	0	0	0	0	2	A1	0	1	A2
600.398	0.0397166	3	B1	0	0	0	0	0	2	A1	1	0	B1
614.6	0.0390718	3	B2	0	0	0	0	0	2	A1	1	1	B2
623.866	0.0388023	3	A1	0	0	0	0	0	2	A1	2	0	A1
627.358	0.0386267	3	A2	0	0	0	0	0	2	A1	2	1	A2
640.443	0.0396107	4	A1	0	0	0	0	0	2	A1	0	0	A1
640.893	0.0396047	4	B2	0	0	0	0	0	2	A1	1	1	B2
650.722	0.0378962	3	B1	0	0	0	0	0	2	A1	3	0	B1
650.893	0.0378864	3	B2	0	0	0	0	0	2	A1	3	1	B2
663.718	0.0386008	4	B1	0	0	0	0	0	2	A1	1	0	B1
669.689	0.0384621	4	A2	0	0	0	0	0	2	A1	2	1	A2
678.41	0.0380522	4	A1	0	0	0	0	0	2	A1	2	0	A1
690.655	0.0439915	5	A2	0	0	0	0	0	2	A1	0	1	A2
690.81	0.0439025	5	B1	0	0	0	0	0	2	A1	1	0	B1
698.323	0.0374913	4	B2	0	0	0	0	0	2	A1	3	1	B2
699.438	0.0374303	4	B1	0	0	0	0	0	2	A1	3	0	B1
722.825	0.0473869	5	B2	0	0	0	0	0	2	A1	1	1	B2
726.008	0.0460686	5	A1	0	0	0	0	0	2	A1	2	0	A1
734.312	0.0364153	4	A2	0	0	0	0	0	2	A1	4	1	A2
734.342	0.0364134	4	A1	0	0	0	0	0	2	A1	4	0	A1
742.34	0.0498557	5	A2	0	0	0	0	0	2	A1	2	1	A2
757.726	0.0466072	5	B1	0	0	0	0	0	2	A1	3	0	B1
761.587	0.0483477	5	B2	0	0	0	0	0	2	A1	3	1	B2
793.981	0.045369	5	A1	0	0	0	0	0	2	A1	4	0	A1
794.244	0.0455404	5	A2	0	0	0	0	0	2	A1	4	1	A2
839.918	0.0435228	5	B1	0	0	0	0	0	2	A1	5	0	B1
839.923	0.0435266	5	B2	0	0	0	0	0	2	A1	5	1	B2
847.92	0.0225382	0	B1	0	0	0	0	0	3	B1	0	0	A1
859.465	0.0224761	1	B2	0	0	0	0	0	3	B1	0	1	A2
863.216	0.0223996	1	A1	0	0	0	0	0	3	B1	1	0	B1
865.3	0.0223382	1	A2	0	0	0	0	0	3	B1	1	1	B2
881.897	0.0223766	2	B1	0	0	0	0	0	3	B1	0	0	A1
884.219	0.0223383	2	A2	0	0	0	0	0	3	B1	1	1	B2
890.469	0.0221566	2	A1	0	0	0	0	0	3	B1	1	0	B1
901.72	0.0219363	2	B2	0	0	0	0	0	3	B1	2	1	A2
902.376	0.0219137	2	B1	0	0	0	0	0	3	B1	2	0	A1
914.236	0.0222721	3	B2	0	0	0	0	0	3	B1	0	1	A2
915.357	0.0222596	3	A1	0	0	0	0	0	3	B1	1	0	B1
927.716	0.0219081	3	A2	0	0	0	0	0	3	B1	1	1	B2
936.332	0.0217618	3	B1	0	0	0	0	0	3	B1	2	0	A1
939.274	0.0216661	3	B2	0	0	0	0	0	3	B1	2	1	A2
955.897	0.0221749	4	B1	0	0	0	0	0	3	B1	0	0	A1
956.347	0.0221724	4	A2	0	0	0	0	0	3	B1	1	1	B2
960.646	0.0212641	3	A1	0	0	0	0	0	3	B1	3	0	B1
960.783	0.0212588	3	A2	0	0	0	0	0	3	B1	3	1	B2
976.264	0.0216249	4	A1	0	0	0	0	0	3	B1	1	0	B1
981.949	0.0215512	4	B2	0	0	0	0	0	3	B1	2	1	A2
989.357	0.0213266	4	B1	0	0	0	0	0	3	B1	2	0	A1

## Sheet: D2HOp
E	tau, s	J	Sym-tot	v1str	v2str	v3str	v4bnd	v5bnd	v6inv	Sym-vib	K	tau-rot	Sym-rot
0	inf	0	A1	0	0	0	0	0	0	A1	0	0	A1
9.5305	inf	1	B1	0	0	0	0	0	0	A1	1	0	B1
12.1895	150903	1	A2	0	0	0	0	0	0	A1	0	1	A2
14.2433	1.86423e+06	1	B2	0	0	0	0	0	0	A1	1	1	B2
26.9157	462.313	0	B1	0	0	0	0	0	1	B1	0	0	A1
27.7746	120157	2	A1	0	0	0	0	0	0	A1	2	0	A1
29.1946	38121.8	2	B2	0	0	0	0	0	0	A1	1	1	B2
35.3532	771130	2	A2	0	0	0	0	0	0	A1	2	1	A2
36.4426	132.013	1	A1	0	0	0	0	0	1	B1	1	0	B1
39.0252	73.3277	1	B2	0	0	0	0	0	1	B1	0	1	A2
41.0198	40.6765	1	A2	0	0	0	0	0	1	B1	1	1	B2
43.3192	8323.83	2	B1	0	0	0	0	0	0	A1	1	0	B1
44.1336	11879.5	2	A1	0	0	0	0	0	0	A1	0	0	A1
53.6962	18748.8	3	B1	0	0	0	0	0	0	A1	1	0	B1
54.2581	13775.5	3	A2	0	0	0	0	0	0	A1	2	1	A2
54.7057	75.947	2	B1	0	0	0	0	0	1	B1	2	0	A1
56.0838	67.5562	2	A2	0	0	0	0	0	1	B1	1	1	B2
62.0648	21.0998	2	B2	0	0	0	0	0	1	B1	2	1	A2
66.3442	2261.2	3	B2	0	0	0	0	0	0	A1	3	1	B2
69.805	14.6071	2	A1	0	0	0	0	0	1	B1	1	0	B1
70.5935	13.5075	2	B1	0	0	0	0	0	1	B1	0	0	A1
71.8914	836.092	3	A1	0	0	0	0	0	0	A1	2	0	A1
75.367	1038.37	3	B1	0	0	0	0	0	0	A1	3	0	B1
80.7052	61.9655	3	A1	0	0	0	0	0	1	B1	1	0	B1
81.2428	61.6861	3	B2	0	0	0	0	0	1	B1	2	1	A2
86.9008	6450.63	4	A1	0	0	0	0	0	0	A1	2	0	A1
87.0844	5974.32	4	B2	0	0	0	0	0	0	A1	1	1	B2
90.6933	216.359	3	A2	0	0	0	0	0	0	A1	0	1	A2
90.9327	253.024	3	B2	0	0	0	0	0	0	A1	1	1	B2
92.9998	12.5273	3	A2	0	0	0	0	0	1	B1	3	1	B2
98.3794	10.7375	3	B1	0	0	0	0	0	1	B1	2	0	A1
101.742	8.68909	3	A1	0	0	0	0	0	1	B1	3	0	B1
106.181	263.879	4	A2	0	0	0	0	0	0	A1	4	1	A2
109.283	190.771	4	B1	0	0	0	0	0	0	A1	3	0	B1
114.086	57.4452	4	B1	0	0	0	0	0	1	B1	2	0	A1
114.234	57.2845	4	A2	0	0	0	0	0	1	B1	1	1	B2
116.654	6.0439	3	B2	0	0	0	0	0	1	B1	0	1	A2
116.868	5.98057	3	A2	0	0	0	0	0	1	B1	1	1	B2
117.625	180.547	4	A1	0	0	0	0	0	0	A1	4	0	A1
127.437	3067.18	5	B1	0	0	0	0	0	0	A1	1	0	B1
127.491	3012	5	A2	0	0	0	0	0	0	A1	2	1	A2
129.908	72.5489	4	B2	0	0	0	0	0	0	A1	3	1	B2
131.351	90.9705	4	A2	0	0	0	0	0	0	A1	2	1	A2
132.848	8.47656	4	B2	0	0	0	0	0	1	B1	4	1	A2
135.829	7.95836	4	A1	0	0	0	0	0	1	B1	3	0	B1
143.871	5.69348	4	B1	0	0	0	0	0	1	B1	4	0	A1
153.389	71.0918	5	B2	0	0	0	0	0	0	A1	3	1	B2
154.183	56.0384	5	A1	0	0	0	0	0	1	B1	1	0	B1
154.667	39.8182	4	B1	0	0	0	0	0	0	A1	1	0	B1
154.713	40.0157	4	A1	0	0	0	0	0	0	A1	2	0	A1
155.176	60.9448	5	B2	0	0	0	0	0	1	B1	2	1	A2
155.732	72.229	5	A1	0	0	0	0	0	0	A1	4	0	A1
155.873	4.63924	4	A2	0	0	0	0	0	1	B1	3	1	B2
157.207	4.43066	4	B2	0	0	0	0	0	1	B1	2	1	A2
170.093	56.497	5	B1	0	0	0	0	0	0	A1	5	0	B1
178.534	22.6439	5	A2	0	0	0	0	0	0	A1	4	1	A2
179.879	3.13808	4	A1	0	0	0	0	0	1	B1	1	0	B1
179.927	3.13418	4	B1	0	0	0	0	0	1	B1	2	0	A1
180.609	6.89578	5	A2	0	0	0	0	0	1	B1	3	1	B2
181.711	6.06113	5	B1	0	0	0	0	0	1	B1	4	0	A1
183.261	39.904	5	B2	0	0	0	0	0	0	A1	5	1	B2
196.19	3.94619	5	A1	0	0	0	0	0	1	B1	5	0	B1
204.069	21.7624	5	A1	0	0	0	0	0	0	A1	2	0	A1
204.454	22.3546	5	B1	0	0	0	0	0	0	A1	3	0	B1
204.675	3.5591	5	B2	0	0	0	0	0	1	B1	4	1	A2
208.983	3.21077	5	A2	0	0	0	0	0	1	B1	5	1	B2
229.195	2.52475	5	B1	0	0	0	0	0	1	B1	2	0	A1
229.589	2.50494	5	A1	0	0	0	0	0	1	B1	3	0	B1
235.245	12.4684	5	A2	0	0	0	0	0	0	A1	2	1	A2
235.255	12.4746	5	B2	0	0	0	0	0	0	A1	1	1	B2
259.561	1.84754	5	B2	0	0	0	0	0	1	B1	2	1	A2
259.57	1.8473	5	A2	0	0	0	0	0	1	B1	1	1	B2
489.443	0.0580943	0	A1	0	0	0	0	0	2	A1	0	0	A1
498.909	0.0579841	1	B1	0	0	0	0	0	2	A1	1	0	B1
501.707	0.0578499	1	A2	0	0	0	0	0	2	A1	0	1	A2
503.816	0.057724	1	B2	0	0	0	0	0	2	A1	1	1	B2
517.016	0.0578208	2	A1	0	0	0	0	0	2	A1	2	0	A1
518.528	0.0577576	2	B2	0	0	0	0	0	2	A1	1	1	B2
524.854	0.0573835	2	A2	0	0	0	0	0	2	A1	2	1	A2
533.241	0.0569947	2	B1	0	0	0	0	0	2	A1	1	0	B1
534.063	0.0569413	2	A1	0	0	0	0	0	2	A1	0	0	A1
542.703	0.0576693	3	B1	0	0	0	0	0	2	A1	1	0	B1
543.311	0.0576487	3	A2	0	0	0	0	0	2	A1	2	1	A2
555.737	0.0569264	3	B2	0	0	0	0	0	2	A1	3	1	B2
561.629	0.0566797	3	A1	0	0	0	0	0	2	A1	2	0	A1
565.149	0.0564615	3	B1	0	0	0	0	0	2	A1	3	0	B1
575.553	0.0575462	4	A1	0	0	0	0	0	2	A1	2	0	A1
575.755	0.057541	4	B2	0	0	0	0	0	2	A1	1	1	B2
581.298	0.055743	3	A2	0	0	0	0	0	2	A1	0	1	A2
581.518	0.0557278	3	B2	0	0	0	0	0	2	A1	1	1	B2
595.439	0.0564253	4	A2	0	0	0	0	0	2	A1	4	1	A2
598.803	0.0563077	4	B1	0	0	0	0	0	2	A1	3	0	B1
607.257	0.0558097	4	A1	0	0	0	0	0	2	A1	4	0	A1
615.613	0.0646084	5	B1	0	0	0	0	0	2	A1	1	0	B1
615.673	0.064546	5	A2	0	0	0	0	0	2	A1	2	1	A2
620.323	0.0552766	4	B2	0	0	0	0	0	2	A1	3	1	B2
621.698	0.0551857	4	A2	0	0	0	0	0	2	A1	2	1	A2
642.751	0.0701456	5	B2	0	0	0	0	0	2	A1	3	1	B2
644.282	0.0689138	5	A1	0	0	0	0	0	2	A1	4	0	A1
646.224	0.0541501	4	B1	0	0	0	0	0	2	A1	1	0	B1
646.272	0.0541466	4	A1	0	0	0	0	0	2	A1	2	0	A1
659.589	0.0751773	5	B1	0	0	0	0	0	2	A1	5	0	B1
668.881	0.0712764	5	A2	0	0	0	0	0	2	A1	4	1	A2
673.351	0.074769	5	B2	0	0	0	0	0	2	A1	5	1	B2
695.307	0.0710325	5	A1	0	0	0	0	0	2	A1	2	0	A1
695.707	0.0715203	5	B1	0	0	0	0	0	2	A1	3	0	B1
728.12	0.0697657	5	A2	0	0	0	0	0	2	A1	2	1	A2
728.13	0.0697801	5	B2	0	0	0	0	0	2	A1	1	1	B2
742.987	0.034278	0	B1	0	0	0	0	0	3	B1	0	0	A1
752.421	0.0341971	1	A1	0	0	0	0	0	3	B1	1	0	B1
754.957	0.0341168	1	B2	0	0	0	0	0	3	B1	0	1	A2
756.847	0.0340361	1	A2	0	0	0	0	0	3	B1	1	1	B2
770.554	0.0340731	2	B1	0	0	0	0	0	3	B1	2	0	A1
771.932	0.0340373	2	A2	0	0	0	0	0	3	B1	1	1	B2
777.603	0.0337978	2	B2	0	0	0	0	0	3	B1	2	1	A2
785.205	0.0335649	2	A1	0	0	0	0	0	3	B1	1	0	B1
785.937	0.0335297	2	B1	0	0	0	0	0	3	B1	0	0	A1
796.439	0.0339483	3	A1	0	0	0	0	0	3	B1	1	0	B1
796.996	0.0339379	3	B2	0	0	0	0	0	3	B1	2	1	A2
808.138	0.0334769	3	A2	0	0	0	0	0	3	B1	3	1	B2
813.499	0.0333341	3	B1	0	0	0	0	0	3	B1	2	0	A1
816.636	0.0331909	3	A1	0	0	0	0	0	3	B1	3	0	B1
829.692	0.0338325	4	B1	0	0	0	0	0	3	B1	2	0	A1
829.878	0.0338304	4	A2	0	0	0	0	0	3	B1	1	1	B2
831.271	0.0327583	3	B2	0	0	0	0	0	3	B1	0	1	A2
831.465	0.0327479	3	A2	0	0	0	0	0	3	B1	1	1	B2
847.54	0.0331226	4	B2	0	0	0	0	0	3	B1	4	1	A2
850.621	0.0330595	4	A1	0	0	0	0	0	3	B1	3	0	B1
858.169	0.0327355	4	B1	0	0	0	0	0	3	B1	4	0	A1
870.043	0.032422	4	A2	0	0	0	0	0	3	B1	3	1	B2
870.351	0.0384444	5	A1	0	0	0	0	0	3	B1	1	0	B1
870.407	0.0384111	5	B2	0	0	0	0	0	3	B1	2	1	A2
871.258	0.0323607	4	B2	0	0	0	0	0	3	B1	2	1	A2
893.471	0.0317313	4	A1	0	0	0	0	0	3	B1	1	0	B1
893.513	0.0317289	4	B1	0	0	0	0	0	3	B1	2	0	A1
894.729	0.0413616	5	A2	0	0	0	0	0	3	B1	3	1	B2
896.141	0.0407264	5	B1	0	0	0	0	0	3	B1	4	0	A1
909.83	0.0439098	5	A1	0	0	0	0	0	3	B1	5	0	B1
918.313	0.0419638	5	B2	0	0	0	0	0	3	B1	4	1	A2
922.274	0.0437051	5	A2	0	0	0	0	0	3	B1	5	1	B2
942.203	0.0418741	5	B1	0	0	0	0	0	3	B1	2	0	A1
942.554	0.0421143	5	A1	0	0	0	0	0	3	B1	3	0	B1
971.904	0.0412715	5	B2	0	0	0	0	0	3	B1	2	1	A2
971.912	0.0412785	5	A2	0	0	0	0	0	3	B1	1	1	B2
